# Supplementary material
Source: PubMed Central journal article supplement (PMC2877560)
Supplement: JCI35846sd.pdf [file JCI35846sd.pdf]

### **Supplementary Table 1**

Real-time PCR primer sequences were as below.

| Species | Primers               | Gene         |
|---------|-----------------------|--------------|
| Human   | gaaagcgcaagtcctcaaag  | HIF1a        |
| Human   | tggttaggatggagatgc    | HIF1a        |
| Human   | gttgagttgcagggtgtgg   | TBP          |
| Human   | ctcaaaccaactgtcaacagc | TBP          |
| Mouse   | tgatcctttccacgagacc   | AldolaseB    |
| Mouse   | tcagcaatcctcaacacagc  | AldolaseB    |
| Mouse   | tctccctcccagatgatgac  | Arnt         |
| Mouse   | caatgttgtgcgggagatg   | Arnt         |
| Mouse   | gtggcagccattggacttt   | G6PI         |
| Mouse   | ctggaaataggcagcaaagc  | G6PI         |
| Mouse   | aaagatgtgcccacctacg   | GCK          |
| Mouse   | tctgggtttctgtcttcacg  | GCK          |
| Mouse   | aggtcaccatcttgagactg  | Glut1        |
| Mouse   | acagcgacaccacagtgaag  | Glut1        |
| Mouse   | catgctgagctctgctgaag  | Glut2        |
| Mouse   | acagtccaacggatccactc  | Glut2        |
| Mouse   | tcaagtcagcaacgtggaag  | Hif1a        |
| Mouse   | tatcgaggctgtgtcgactg  | Hif1a        |
| Mouse   | actgcagcagcacaacatc   | HNF1a / TCF1 |
| Mouse   | gaattgctgagccacctctc  | HNF1a / TCF1 |
| Mouse   | gcacctcagataagccgctc  | HNF1b / TCF2 |
| Mouse   | tttctcccttctcgttgac   | HNF1b / TCF2 |
| Mouse   | ggcgaagctacgaggacagc  | HNF4alpha    |
| Mouse   | atgtactggcccactcgac   | HNF4alpha    |
| Mouse   | tcccaaacagaaggaggatg  | Irs1         |
| Mouse   | cattccgaggagagctttg   | Irs1         |
| Mouse   | gtagttcaggtcgcctctgc  | Irs2         |
| Mouse   | ttgggaccaccactcctaag  | Irs2         |
| Mouse   | agagggggaacgactctagg  | PDX-1        |
| Mouse   | acttgagcgttccaatacgg  | PDX-1        |
| Mouse   | atggcaaagctatcgggtgc  | Pfk          |
| Mouse   | acacagtcccattggcttc   | Pfk          |
| Mouse   | tcaggccattgaggaaaatc  | Pgm1         |
| Mouse   | cgaactcaccttgctctcc   | Pgm1         |
| Mouse   | tatcactctgccacaccag   | TBP          |
| Mouse   | atgatgactgcagcaaatcg  | TBP          |

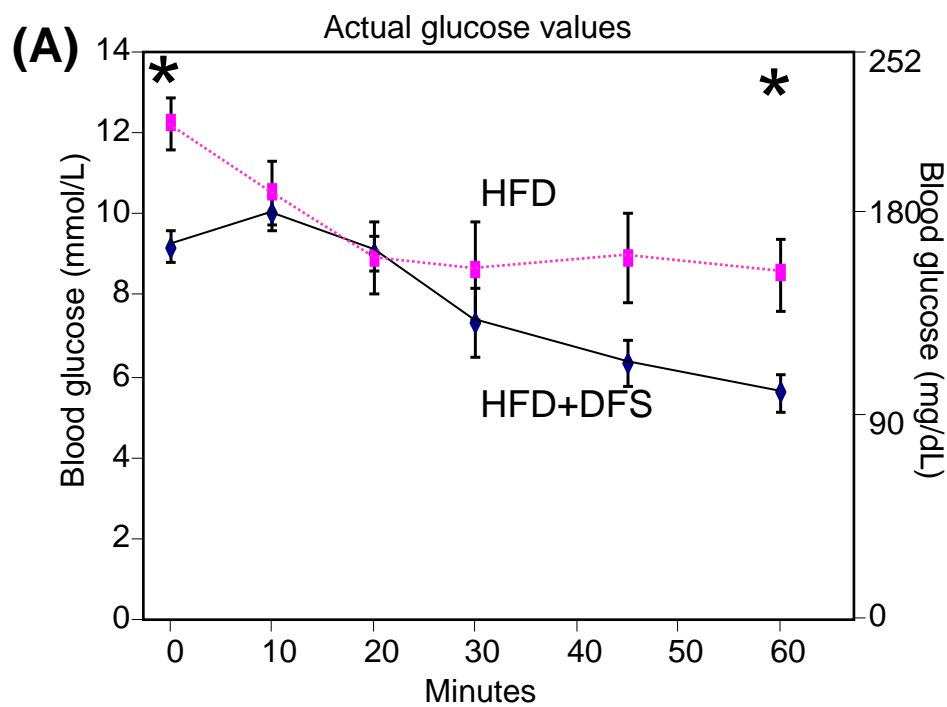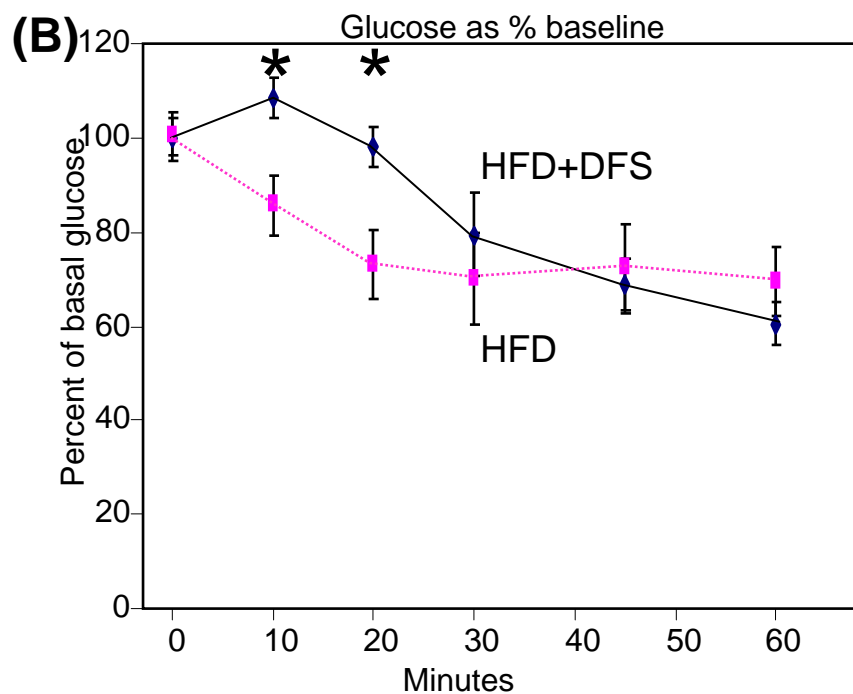

**Supplementary Figure 1.** Mice receiving high fat diet (HFD) with or without deferiasirox (DFS) had insulin tolerance testing after 8 weeks on the diet. Insulin (0.33 IU/kg) was given intraperitoneally and glucose was measured from a tail-nick at the times shown. **(A)** HFD+DFS mice had significantly lower fasting and 60 minute glucoses. **(B)** Expressed as a percentage of baseline, HFD+DFS mice had significantly higher percentages early, but achieved a similar decreases. Average weight was  $26.7 \pm 1.0$ g in HFD+DFS and  $26.5 \pm 0.8$ g in HFD alone mice. Error bars indicate  $\pm 1$ SEM. \*= $p < 0.05$ .
